# Supplementary material for: Postinjury Sepsis—Associations With Risk Factors, Impact on Clinical Course, and Mortality: A Retrospective Observational Study
Source: PubMed Central journal article supplement — Crit Care Explor. 2021 Aug 2;3(8):e0495. doi: 10.1097/CCE.0000000000000495 (PMC8330967; doi:10.1097/cce.0000000000000495), 2021-08-02
Supplement: cc9-3-e0495-s001.pdf [file cc9-3-e0495-s001.pdf]

Trauma Patients  
16 feb 2007-29 oct 2016  
(n = 14527)

Not admitted to the Central  
ICU  
(n = 11997)

ICU admitted patients  
(n = 2530)

Assessed ICU LOS <24h  
(n = 1295)

Eligible for study  
(n = 1235)

Shortage of staff / resources  
(n = 513)

Included in study  
(n = 722)
