# Supplementary material for: Postinjury Sepsis—Associations With Risk Factors, Impact on Clinical Course, and Mortality: A Retrospective Observational Study
Source: PubMed Central journal article supplement — Crit Care Explor. 2021 Aug 2;3(8):e0495. doi: 10.1097/CCE.0000000000000495 (PMC8330967; doi:10.1097/cce.0000000000000495), 2021-08-02
Supplement: cc9-3-e0495-s002.pdf [file cc9-3-e0495-s002.pdf]

**Supplemental table 1**

Admission data, patients dead within first and second day presented separately.

| <b>Factor</b>         | <b>Level</b>   | <b>all</b>  | <b>missing<br/>(n)</b> | <b>Deaths<br/>within first<br/>day</b> | <b>non-sepsis (excl<br/>deaths within<br/>first day)</b> | <b>sepsis (excl<br/>deaths within<br/>first day)</b> | <b>Deaths<br/>within first<br/>and second<br/>day</b> | <b>non-sepsis (excl<br/>deaths within<br/>first and<br/>second day)</b> | <b>sepsis (excl<br/>deaths within<br/>first and<br/>second day)</b> |
|-----------------------|----------------|-------------|------------------------|----------------------------------------|----------------------------------------------------------|------------------------------------------------------|-------------------------------------------------------|-------------------------------------------------------------------------|---------------------------------------------------------------------|
| N                     |                | 722         |                        | 9                                      | 555 (78%)                                                | 158 (22%)                                            | 20                                                    | 544 (77%)                                                               | 158 (23%)                                                           |
| Age                   |                | 41 (28- 58) | 0                      | 49 (40-73)                             | 39 (27-56)                                               | 47 (31-63)                                           | 58 (38-75)                                            | 39 (27-55)                                                              | 47 (31-63)                                                          |
| Sex                   | female         | 161 (22%)   | 0                      | 2 (22%)                                | 127 (23%)                                                | 32 (20%)                                             | 5 (25%)                                               | 124 (23%)                                                               | 32 (20%)                                                            |
| CCI >0                |                | 166 (23%)   | 0                      | 3 (33%)                                | 119 (21%)                                                | 44 (28%)                                             | 7 (35%)                                               | 115 (21%)                                                               | 44 (28%)                                                            |
| CCI, points           |                | 0 (0-0)     | 0                      | 1 (0-1)                                | 0 (0-0)                                                  | 0 (0-1)                                              | 0 (0-1)                                               | 0 (0-0)                                                                 | 0 (0-1)                                                             |
| Injury<br>mechanisms  |                |             | 0                      |                                        |                                                          |                                                      |                                                       |                                                                         |                                                                     |
|                       | Traffic        | 302 (42%)   | 0                      | 3 (33%)                                | 226 (41%)                                                | 73 (46%)                                             | 7 (35%)                                               | 222 (41%)                                                               | 73 (46%)                                                            |
|                       | Fall           | 123 (17%)   | 0                      | 2 (22%)                                | 94 (17%)                                                 | 27 (17%)                                             | 5 (25%)                                               | 91 (17%)                                                                | 27 (17%)                                                            |
|                       | Self-inflicted | 120 (17%)   | 0                      | 3 (33%)                                | 86 (16%)                                                 | 31 (20%)                                             | 5 (25%)                                               | 84 (15%)                                                                | 31 (20%)                                                            |
|                       | Assault        | 86 (12%)    | 0                      | 0 (0%)                                 | 75 (14%)                                                 | 11 (7%)                                              | 0 (0%)                                                | 75 (14%)                                                                | 11 (7%)                                                             |
|                       | Others         | 91 (13%)    | 0                      | 1 (11%)                                | 74 (13%)                                                 | 16 (10%)                                             | 3 (15%)                                               | 72 (13%)                                                                | 16 (10%)                                                            |
| Intubated at<br>scene |                | 140 (19%)   | 0                      | 3 (33%)                                | 100 (18%)                                                | 37 (23%)                                             | 7 (35%)                                               | 96 (18%)                                                                | 37 (23%)                                                            |
| ISS                   |                | 26 (18-38)  | 2                      | 34 (25-45)                             | 24 (17-35)                                               | 34 (24-43)                                           | 33.5 (25-45)                                          | 24 (17-34)                                                              | 34 (24-43)                                                          |
| ISS > 15              |                | 605 (84%)   | 2                      | 9 (100%)                               | 451 (81%)                                                | 145 (92%)                                            | 20 (100%)                                             | 440 (81%)                                                               | 145 (92%)                                                           |
| AIS head >2           |                | 294 (41%)   | 0                      | 7 (78%)                                | 216 (39%)                                                | 71 (45%)                                             | 18 (90%)                                              | 205 (38%)                                                               | 71 (45%)                                                            |

|                         |  |               |    |               |               |              |                |               |                |
|-------------------------|--|---------------|----|---------------|---------------|--------------|----------------|---------------|----------------|
| AIS face > 2            |  | 20 (3%)       | 0  | 1 (11%)       | 13 (2%)       | 6 (4%)       | 1 (5%)         | 13 (2%)       | 6 (4%)         |
| AIS neck > 2            |  | 42 (6%)       | 0  | 1 (11%)       | 31 (6%)       | 10 (6%)      | 2 (10%)        | 30 (5.5%)     | 10 (6%)        |
| AIS spine > 2           |  | 175 (24%)     | 0  | 3 (33%)       | 112 (20%)     | 60 (38%)     | 4 (20%)        | 111 (20%)     | 60 (38%)       |
| AIS upper extremity > 2 |  | 36 (5%)       | 0  | 9 (100%)      | 25 (5%)       | 11 (7%)      | 20 (100%)      | 25 (5%)       | 11 (7%)        |
| AIS thorax > 2          |  | 421 (58%)     | 0  | 1 (11%)       | 303 (55%)     | 110 (70%)    | 13 (65%)       | 298 (55%)     | 110 (70%)      |
| AIS abdomen > 2         |  | 178 (25%)     | 0  | 3 (33%)       | 122 (22%)     | 53 (34%)     | 3 (15%)        | 122 (22%)     | 53 (34%)       |
| AIS lower extremity > 2 |  | 233 (32%)     | 0  | 2 (22%)       | 164 (30%)     | 67 (42%)     | 2 (10%)        | 164 (30%)     | 67 (42%)       |
| Penetrating trauma      |  | 88 (12%)      | 0  | 1 (11%)       | 74 (13%)      | 13 (8%)      | 1 (5%)         | 74 (14%)      | 13 (8%)        |
| Shock on arrival        |  | 115 (16%)     | 9  | 4 (44%)       | 63 (11%)      | 48 (30%)     | 5 (25%)        | 62 (11%)      | 48 (30%)       |
| Admission SAP           |  | 122 (103-148) | 9  | 101 (80-135)  | 127 (110-150) | 110 (84-135) | 131 (91-160.5) | 126 (109-150) | 110 (84.5-135) |
| Admission GCS           |  | 13 (8-15)     | 59 | 5 (3-13)      | 14 (8-15)     | 11 (8-15)    | 3.5 (3-8)      | 14 (8-15)     | 11 (8-15)      |
| BAC > 0 mM              |  | 184 (27%)     | 33 | 9 (100%)      | 138 (26%)     | 46 (31%)     | 3 (17%)        | 135 (26%)     | 46 (31%)       |
| Admission creatinine    |  | 92 (77-112)   | 34 | 135 (122-161) | 91 (75-109)   | 99 (84-119)  | 103 (82-135)   | 91 (75-109)   | 99 (84-119)    |
| Admission TIC           |  | 105 (16%)     | 76 | 1 (12%)       | 71 (14%)      | 33 (23%)     | 3 (19%)        | 69 (14%)      | 33 (23%)       |
| Massive transfusion     |  | 125 (17%)     | 0  | 5 (56%)       | 71 (13%)      | 49 (31%)     | 6 (30%)        | 70 (13%)      | 49 (31%)       |
| Number of PRBC 24 hrs   |  | 2 (0-7)       | 0  | 12 (1-13)     | 1 (0-5)       | 5 (0- 11)    | 2.5 (0-12)     | 1 (0-5)       | 5 (0- 11)      |

|                            |  |                      |   |                       |                      |                       |                       |                          |                       |
|----------------------------|--|----------------------|---|-----------------------|----------------------|-----------------------|-----------------------|--------------------------|-----------------------|
| Total fluid load<br>24 hrs |  | 5550 (3400-<br>8800) | 0 | 9700 (5800-<br>11352) | 5018 (3067-<br>8068) | 7810 (4750-<br>12100) | 6550 (3830-<br>10450) | 5066.5 (3033.5-<br>8059) | 7810 (4750-<br>12100) |
| Surgery first 24<br>hrs    |  | 378 (52%)            | 0 | 4 (44%)               | 282 (51%)            | 92 (58%)              | 6 (30%)               | 280 (52%)                | 92 (58%)              |
| APACHE II                  |  | 15 (11-21)           | 0 | 30 (28-33)            | 14 (10-20)           | 18 (14-23)            | 29.5 (25.5-<br>32.5)  | 14 (10-19)               | 18 (14-23)            |
| Admission<br>SOFA          |  | 5 (3-7)              | 0 | 9 (5-11)              | 5 (3-7)              | 7 (5-9)               | 8 (5.5-10)            | 5 (3-7)                  | 7 (5-9)               |

Continuous parameters presented as median (IQR), and categorical parameters presented as n (%). Missing data depicted as (n). Admission refers to the admission to the trauma unit. Charlson Comorbidity Index (CCI), Injury severity score (ISS), abbreviated injury scale (AIS), systolic arterial blood pressure (SAP), Glasgow Coma Scale (GCS), blood alcohol concentration (BAC), trauma-induced coagulopathy (TIC), packed red blood cells (PRBC), acute and chronic health evaluation II (APACHE II) and sequential organ failure assessment (SOFA).
