# Supplementary material for: Postinjury Sepsis—Associations With Risk Factors, Impact on Clinical Course, and Mortality: A Retrospective Observational Study
Source: PubMed Central journal article supplement — Crit Care Explor. 2021 Aug 2;3(8):e0495. doi: 10.1097/CCE.0000000000000495 (PMC8330967; doi:10.1097/cce.0000000000000495), 2021-08-02
Supplement: cc9-3-e0495-s003.pdf [file cc9-3-e0495-s003.pdf]

**Supplementary table 2**

Likelihood and primary site of infection, microbial pathogens and findings at onset of sepsis.

| <b>Sepsis (n=158)</b>                                 |              |
|-------------------------------------------------------|--------------|
| <i>Likelihood of infection according to ISF (n %)</i> |              |
| Confirmed infection                                   | 44 (27.8 %)  |
| Probable infection                                    | 83 (52.5 %)  |
| Possible infection                                    | 17 (10.8 %)  |
| Unknown (ISF N/A)                                     | 14 (8.9 %)   |
| <i>Primary site of infection, n (%)</i>               |              |
| Pneumonia                                             | 113 (71.5 %) |
| Skin and soft tissue                                  | 17 (10.8 %)  |
| Unknown (ISF N/A)                                     | 14 (8.9 %)   |
| Secondary peritonitis                                 | 11 (7.0 %)   |
| Catheter related                                      | 2 (1.2 %)    |
| Urinary tract                                         | 1 (0.6 %)    |
| <i>Microbial pathogens (n %)</i>                      |              |
| None confirmed                                        | 100 (63.3 %) |
| Staphylococcus Aureus                                 | 15 (9.5 %)   |
| Escherichia Coli                                      | 8 (5.1 %)    |
| Haemophilus Influenzae                                | 7 (4.4 %)    |
| Klebsiella Pneumoniae                                 | 4 (2.5 %)    |
| Streptococcus Pneumoniae                              | 3 (1.9 %)    |
| Enterobacter Cloacae                                  | 3 (1.9 %)    |
| Enterobacter Aerogenes                                | 3 (1.9 %)    |
| Klebsiella Oxytoca                                    | 3 (1.9 %)    |
| Proteus Mirabilis                                     | 2 (1.3 %)    |
| Acinetobacter Baumannii                               | 2 (1.3 %)    |
| Proteus Mirabilis                                     | 2 (1.3 %)    |
| Other                                                 | 6 (3.8 %)    |
| <i>Microbial finding (n %)</i>                        |              |
| None confirmed                                        | 100 (60.8 %) |
| PBS or BAL                                            | 40 (28.4 %)  |
| Sputum                                                | 9 (5.7 %)    |
| Wound, tissue, abscess                                | 6 (3.4 %)    |
| Blood                                                 | 2 (1.4 %)    |
| Urine                                                 | 1 (0.7 %)    |

Supplementary table 2. Likelihood of infection according to ISF classification, primary site of infection according to ISF classification, microbial pathogens, and microbial findings at debute of sepsis. *ISF*, International Sepsis Forum. *PBS*, Protected Brush Specimen. *BAL*, Bronchoalveolar Lavage.
